# Supplementary material for: A Fhit-mimetic peptide suppresses annexin A4-mediated chemoresistance to paclitaxel in lung cancer cells
Source: PubMed Central journal article supplement (PMC5058653; doi:10.18632/oncotarget.9179), 2016-05-04
Supplement: oncotarget-07-29927-s001.pdf [file oncotarget-07-29927-s001.pdf]

## A Fhit-mimetic peptide suppresses annexin A4-mediated chemoresistance to paclitaxel in lung cancer cells

### Supplementary Material

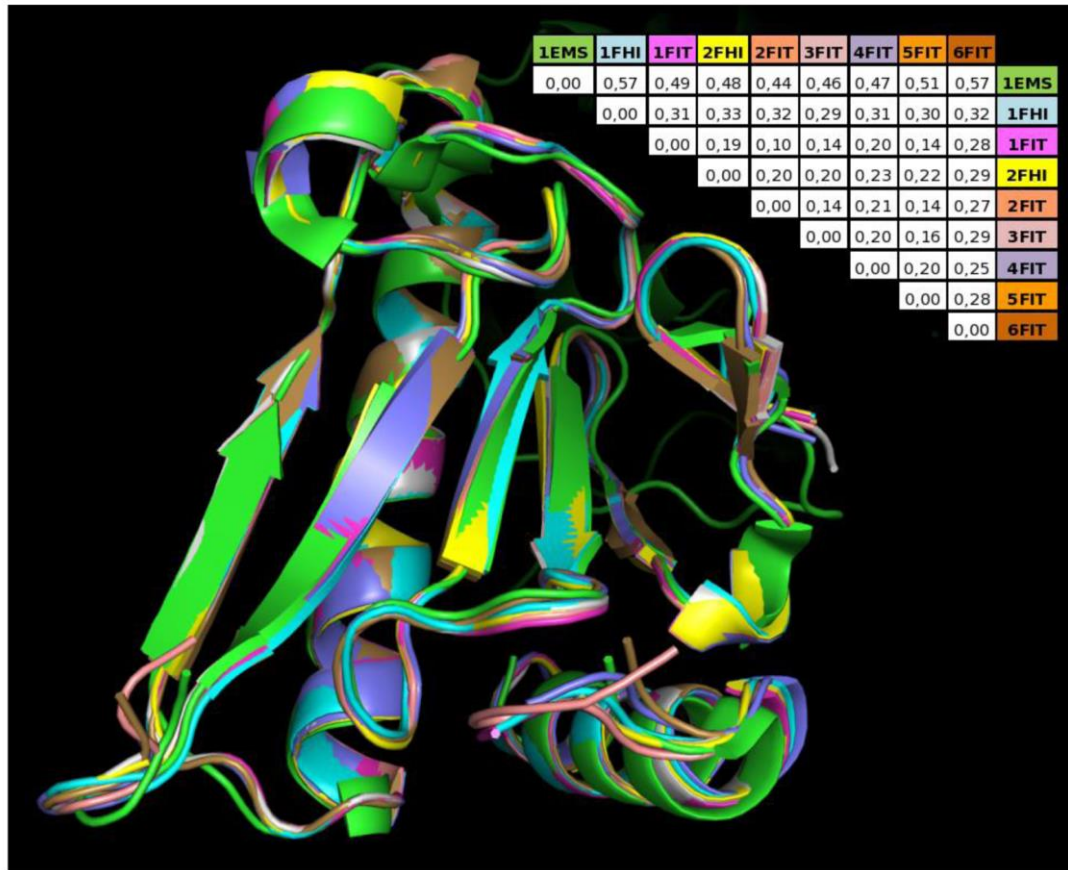

**Supplementary Figure S1. Conformation similarity analysis of Protein Data Bank available Fhit structures.** Fhit crystallographic models deposited in the Protein Data Bank were aligned and compared one each other by computing the root mean square deviation (in Å).

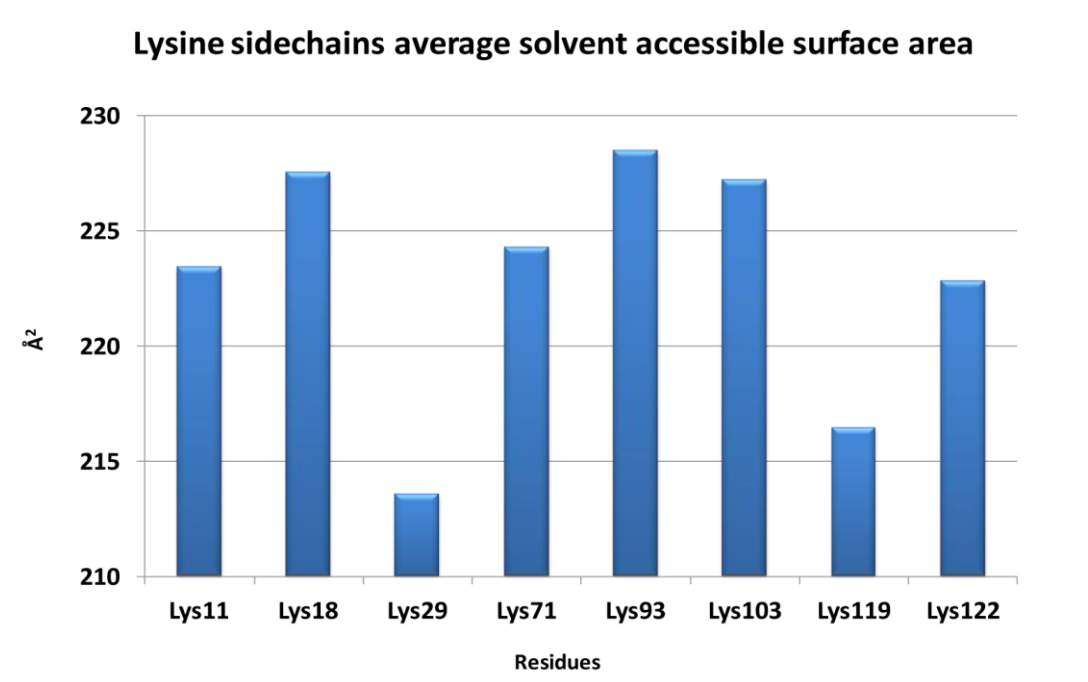

**Supplementary Figure S2. Lysine sidechains average solvent accessible surface area.** The Lys residues solvent exposition was computed on full length protein molecular dynamics trajectory. The solvent was mimicked by a 1.4 Å radius probe.

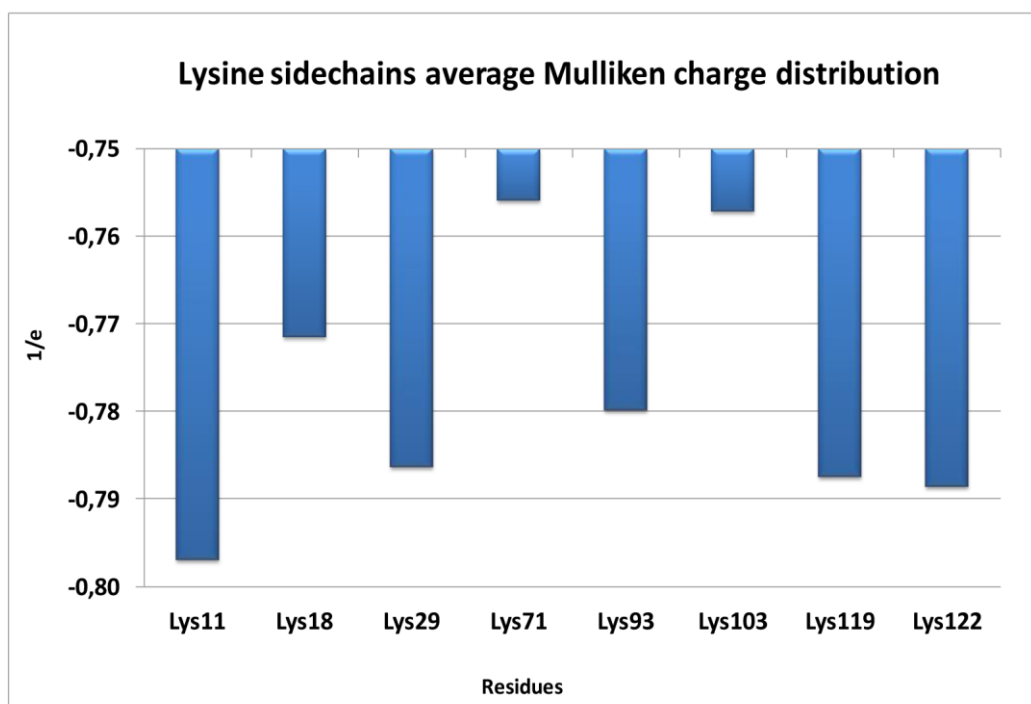

**Supplementary Figure S3. Lysine sidechains averageMulliken charge distribution.** Charge distribution was adopted as a reactivity descriptor of Fhit Lys residues.

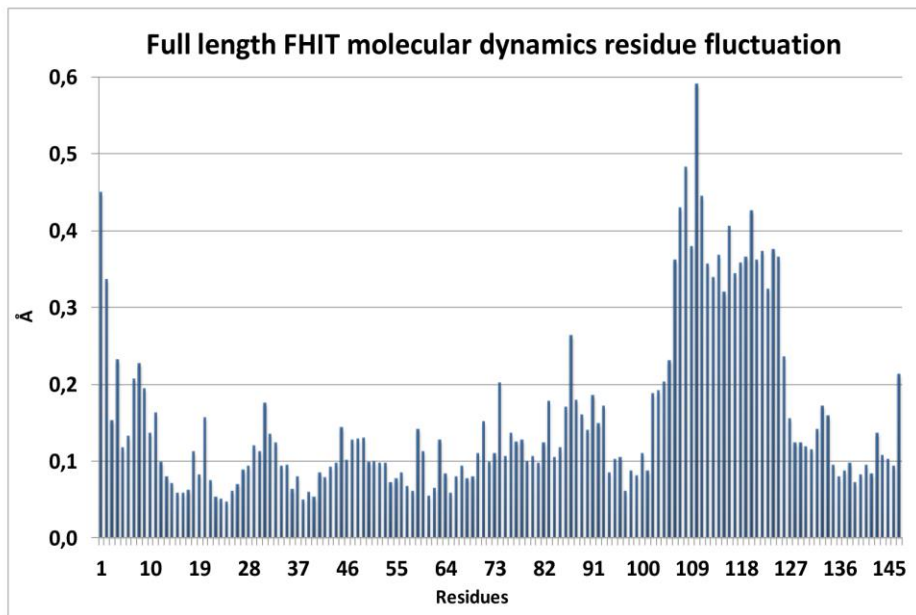

**Supplementary Figure S4. Full length Fhit molecular dynamics residue fluctuation.** Conformation variability of full length Fhit residues during the molecular dynamics simulation.

---

## Full length FHIT vs 1-38 peptide conformation RMSd comparison

■ 0-2 ■ 2-4 ■ 4-6 ■ 6-8

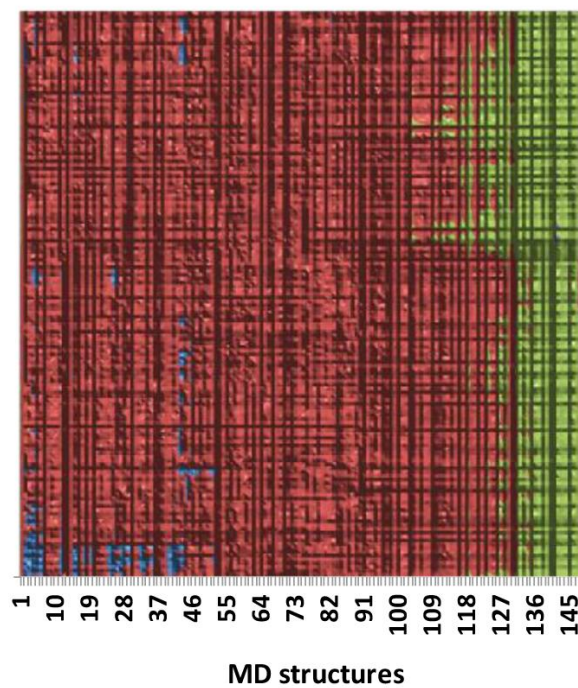

---

**Supplementary Figure S5. Full length Fhit vs 1-38 peptide conformation RMSd comparison.** Root mean square deviation values (in Å) computed, frame by frame, on full length Fhit and 1-38 peptide molecular dynamics trajectories.

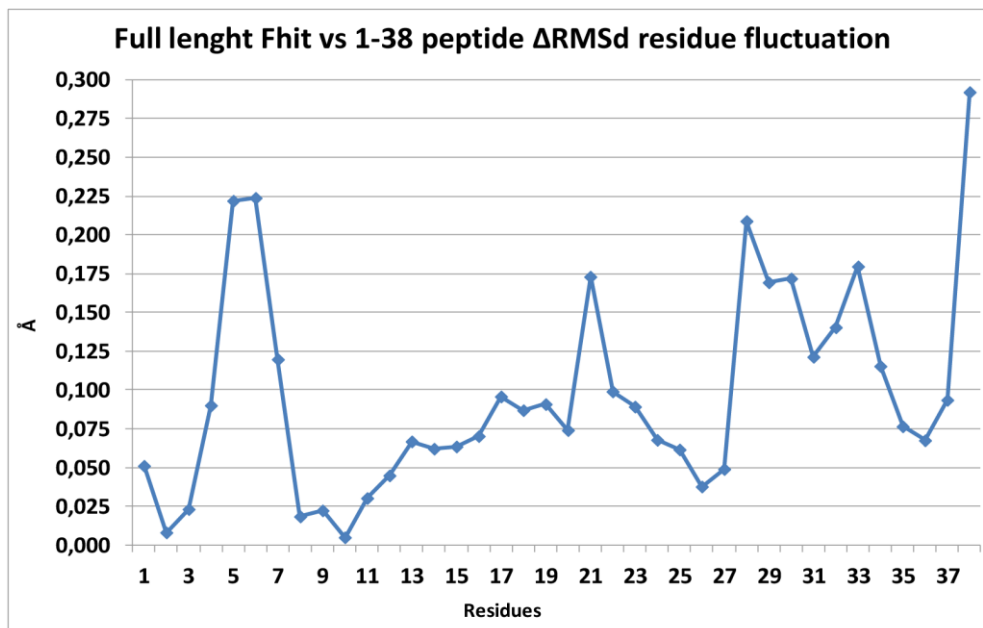

**Supplementary Figure S6. Full length Fhit vs 1-38 peptide  $\Delta$ RMSd residue fluctuation.** Difference of 1-38 residues fluctuation in full length and shortened peptide molecular dynamics trajectories.

A

7-13 F<sub>hit</sub> peptide

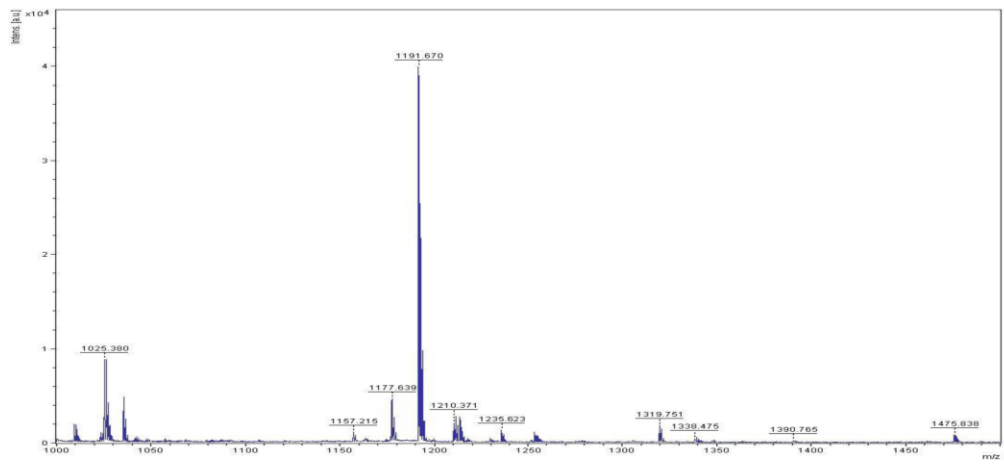

B

Scrambled peptide

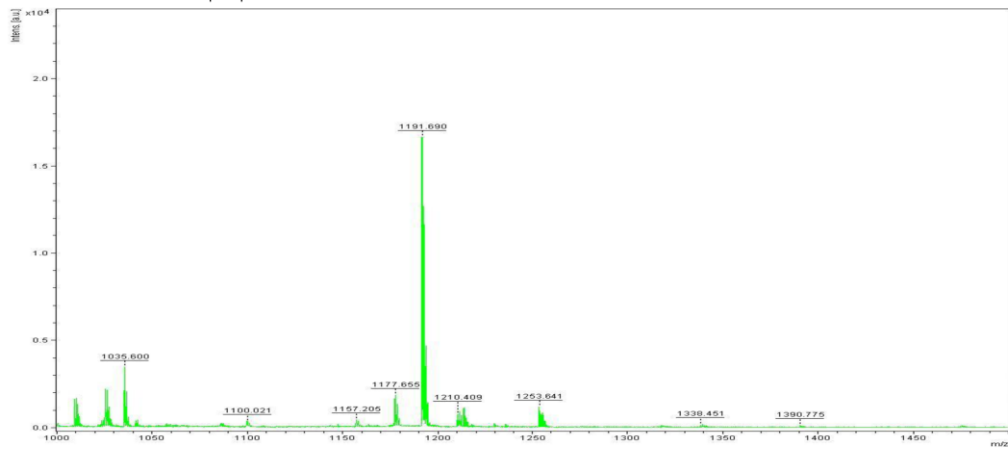

C

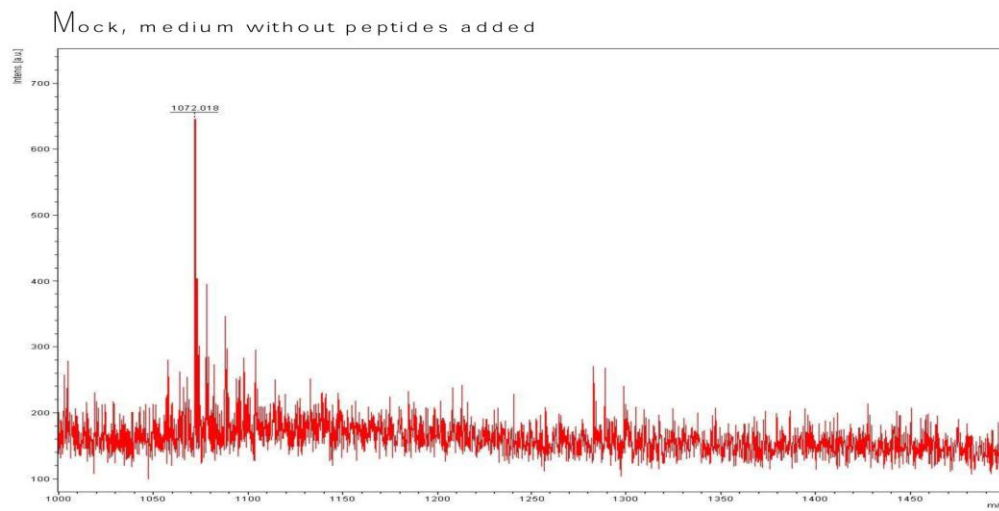

**Supplementary Figures S7A-C. Stability of scrambled and 7-13 Fhit peptides evaluated by MALDI-TOF.** Twenty-four hours after their administration to the medium, both 7-13 Fhit (A) and scrambled (B) peptides resulted still stable and undegraded. Medium without peptides added (C) was taken as control.



A

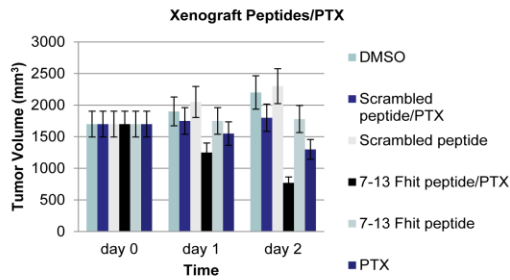

B

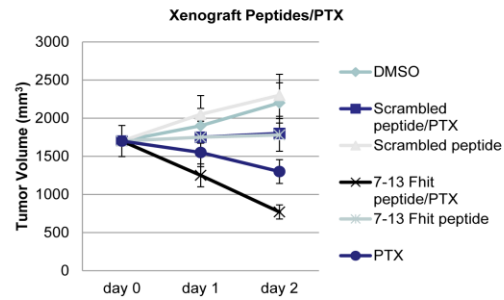

**Supplementary Figures S8A-B. Tat-Fhit 7-13 peptide in combination with paclitaxel blocks *in vivo* tumor formation.** Nude mice were subcutaneously injected with  $1.5 \times 10^7$  A549 cells. When tumors reached 15 mm diameter, mice were mock-treated, treated paclitaxel (single IV administration of 40 mg/kg), with scrambled Tat peptide (50 mg/kg) alone or in combination with paclitaxel, with Tat-Fhit 7-13 peptide (50 mg/Kg) alone or in combination with paclitaxel; paclitaxel and peptides were injected in a single administration. Tumor volume was monitored on daily basis and data is reported as histogram (A) and as lines (B). Bar graphs show mean  $\pm$  SEM for values from 5 mice (\*  $P < 0,05$ ).
